# Supplementary material for: Hsa_circRNA_102051 regulates colorectal cancer proliferation and metastasis by mediating Notch pathway
Source: Springer Nature journal article supplement (doi:10.1186/s12935-023-03026-1), 2023-10-05
Supplement: MOESM1 [file 26132012]

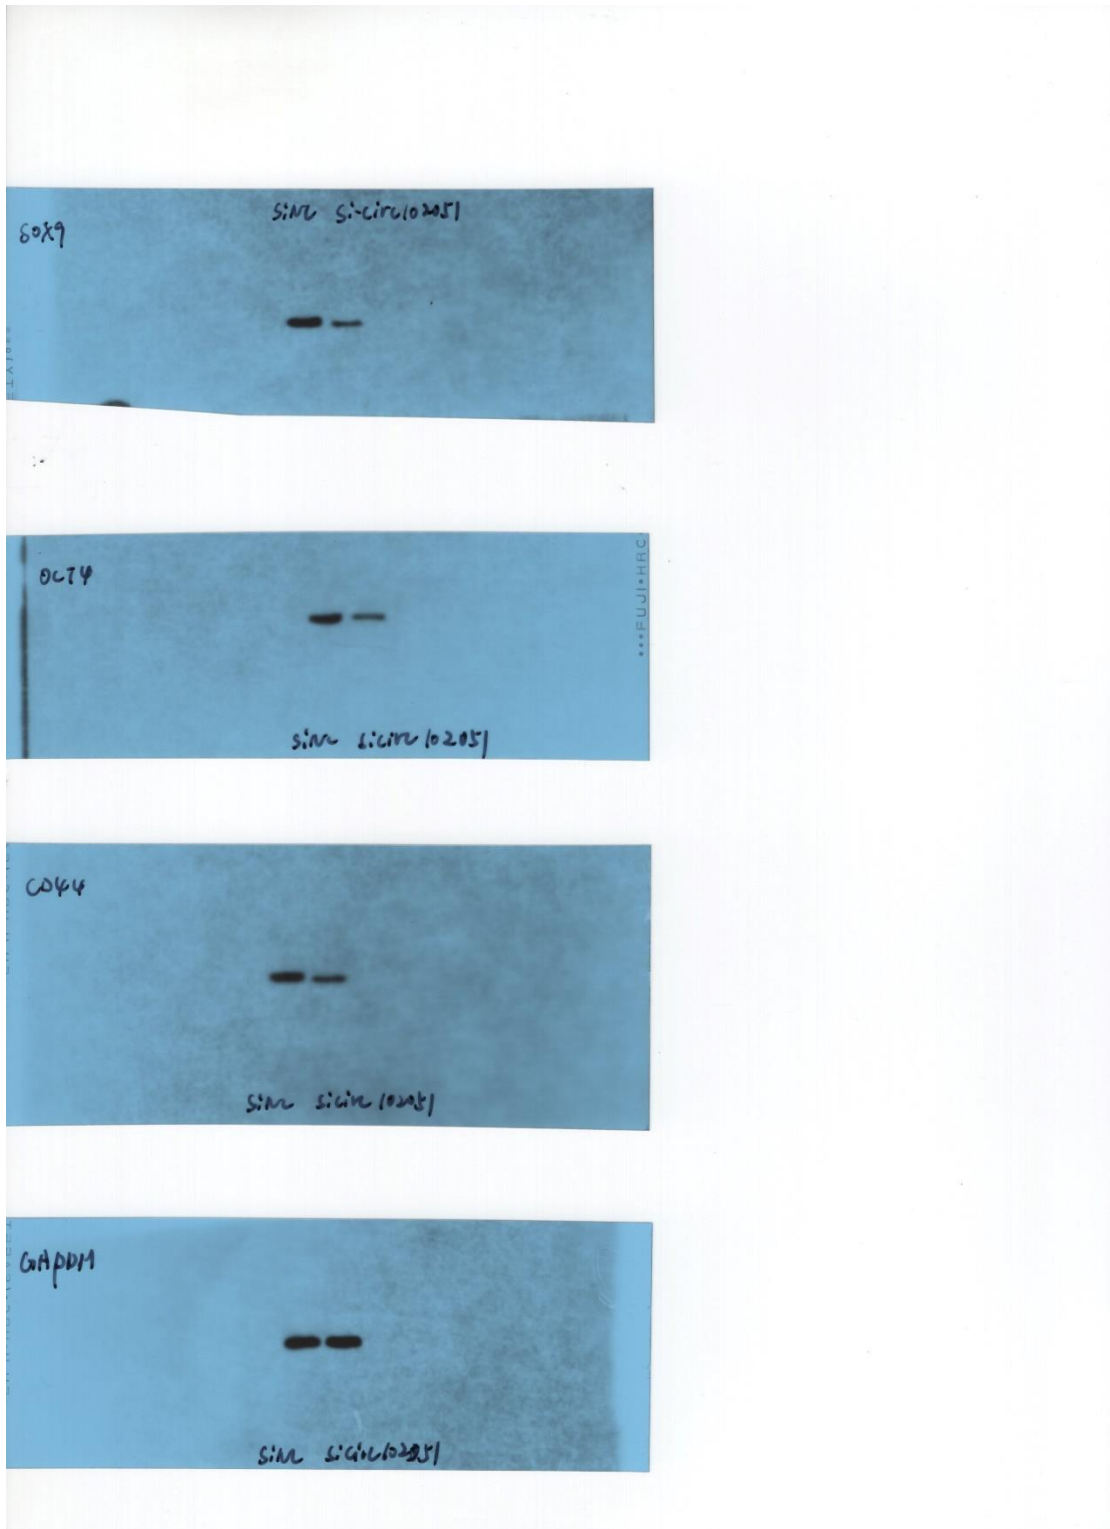

Figure4A (Full unedited blot)

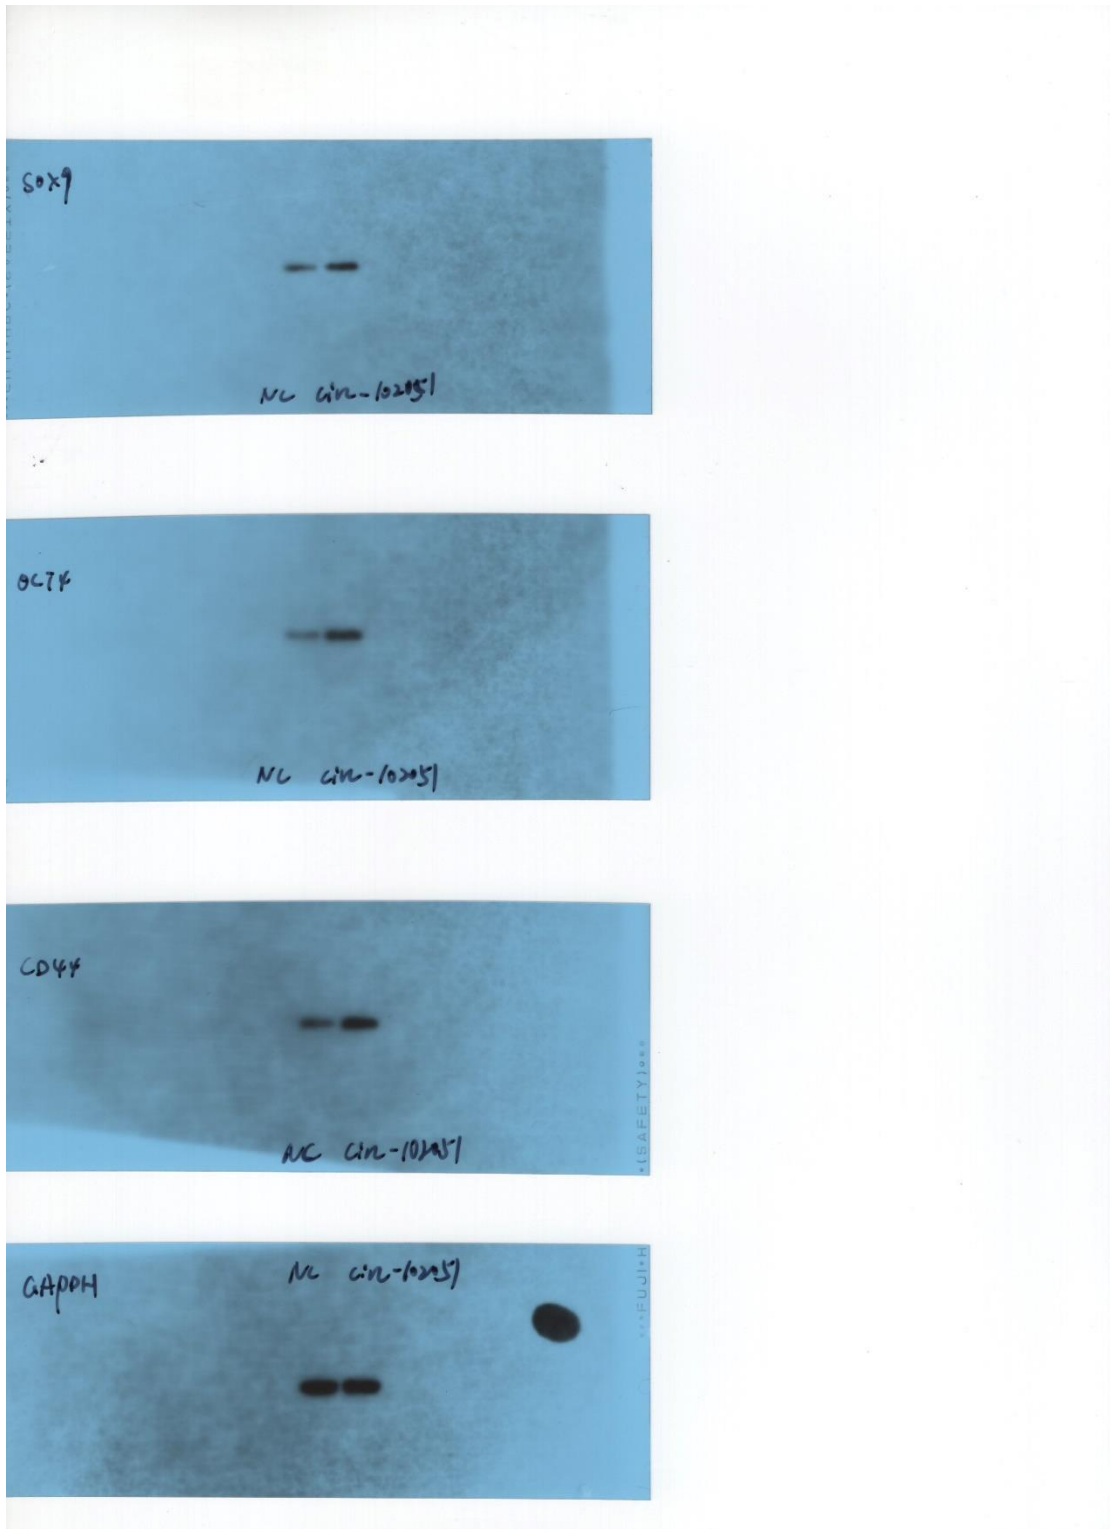

Figure4A (Full unedited blot)

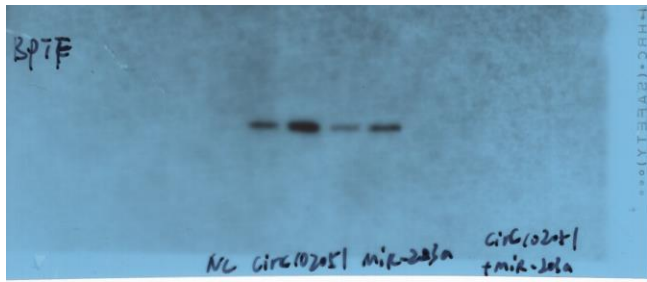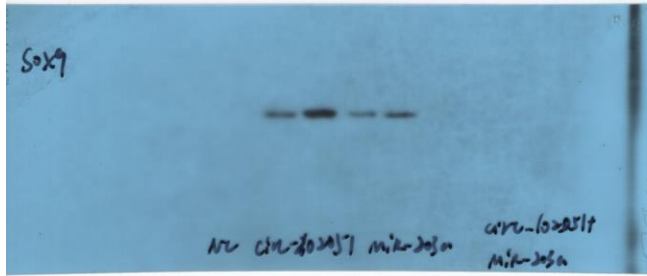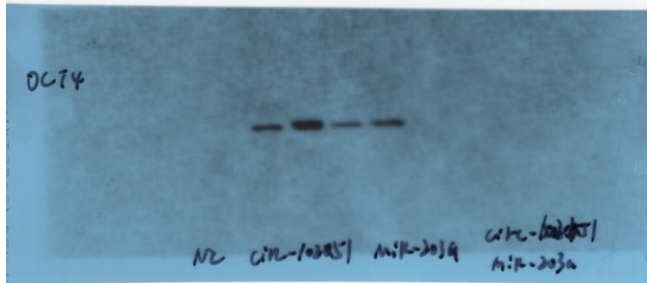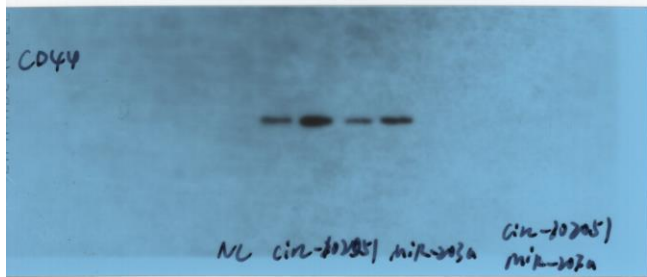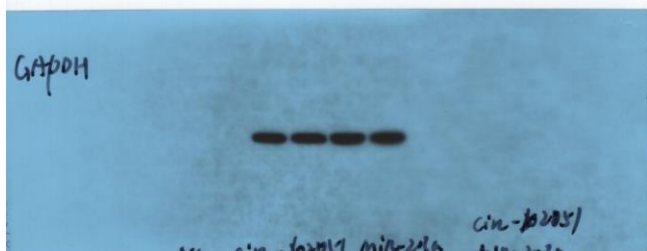

Figure8B (Full unedited blot)

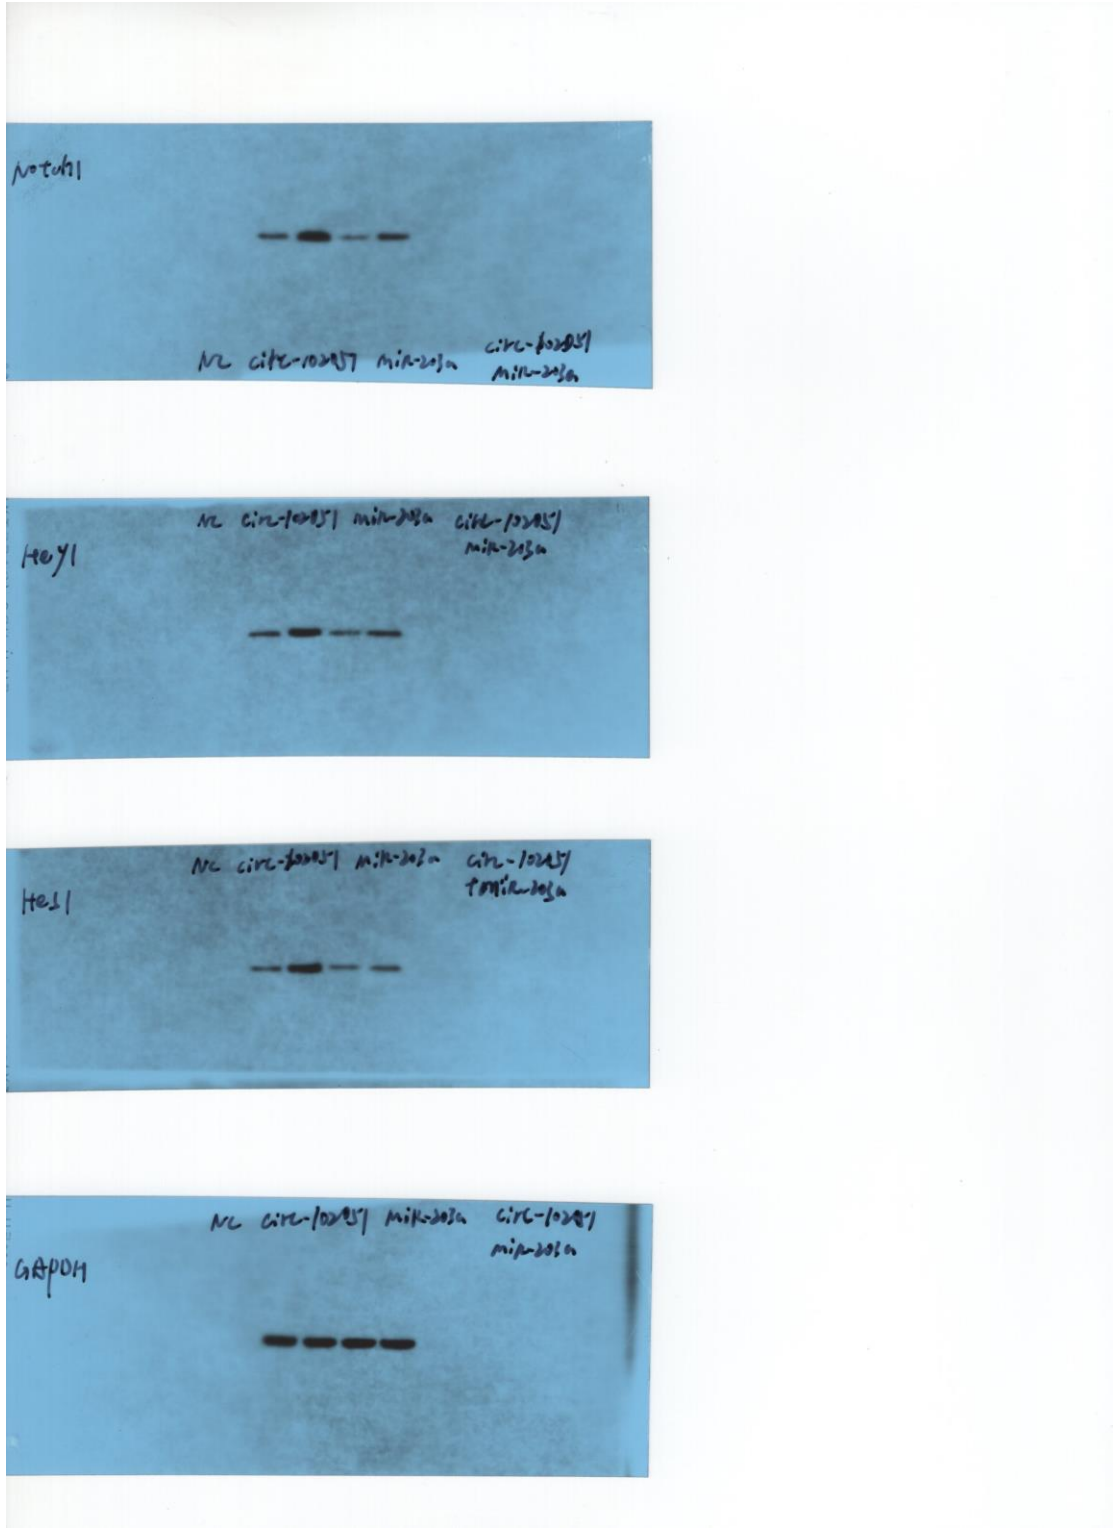

Figure8D (Full unedited blot)
